# Supplementary material for: Experiences of mothers and health workers with MomCare and SafeCare bundles in Kenya and Tanzania: A qualitative evaluation
Source: PubMed Central journal article supplement (PMC10653531; doi:10.1371/journal.pone.0294536), 2023-11-16

# PLOS ONE

## Experiences of mothers and health workers with a Care Bundle in Kenya and Tanzania: a qualitative evaluation --Manuscript Draft--

|                                                                                                                                                                                                                                                                                                                   |                                                                                                                                                                                                                                                                                                                                                                                                                                                                                                                                                                                                                                                                                                                                                                                                                                                                                                                                                                                                                                                                                                                                                                                                                                                                                                                                                                                                                                                                                                                                                                                                                                                                                                                                                                                                                                                                                                                           |
|-------------------------------------------------------------------------------------------------------------------------------------------------------------------------------------------------------------------------------------------------------------------------------------------------------------------|---------------------------------------------------------------------------------------------------------------------------------------------------------------------------------------------------------------------------------------------------------------------------------------------------------------------------------------------------------------------------------------------------------------------------------------------------------------------------------------------------------------------------------------------------------------------------------------------------------------------------------------------------------------------------------------------------------------------------------------------------------------------------------------------------------------------------------------------------------------------------------------------------------------------------------------------------------------------------------------------------------------------------------------------------------------------------------------------------------------------------------------------------------------------------------------------------------------------------------------------------------------------------------------------------------------------------------------------------------------------------------------------------------------------------------------------------------------------------------------------------------------------------------------------------------------------------------------------------------------------------------------------------------------------------------------------------------------------------------------------------------------------------------------------------------------------------------------------------------------------------------------------------------------------------|
| <b>Manuscript Number:</b>                                                                                                                                                                                                                                                                                         | PONE-D-23-14716                                                                                                                                                                                                                                                                                                                                                                                                                                                                                                                                                                                                                                                                                                                                                                                                                                                                                                                                                                                                                                                                                                                                                                                                                                                                                                                                                                                                                                                                                                                                                                                                                                                                                                                                                                                                                                                                                                           |
| <b>Article Type:</b>                                                                                                                                                                                                                                                                                              | Research Article                                                                                                                                                                                                                                                                                                                                                                                                                                                                                                                                                                                                                                                                                                                                                                                                                                                                                                                                                                                                                                                                                                                                                                                                                                                                                                                                                                                                                                                                                                                                                                                                                                                                                                                                                                                                                                                                                                          |
| <b>Full Title:</b>                                                                                                                                                                                                                                                                                                | Experiences of mothers and health workers with a Care Bundle in Kenya and Tanzania: a qualitative evaluation                                                                                                                                                                                                                                                                                                                                                                                                                                                                                                                                                                                                                                                                                                                                                                                                                                                                                                                                                                                                                                                                                                                                                                                                                                                                                                                                                                                                                                                                                                                                                                                                                                                                                                                                                                                                              |
| <b>Short Title:</b>                                                                                                                                                                                                                                                                                               | Experiences with Care bundle in Kenya and Tanzania: a qualitative evaluation                                                                                                                                                                                                                                                                                                                                                                                                                                                                                                                                                                                                                                                                                                                                                                                                                                                                                                                                                                                                                                                                                                                                                                                                                                                                                                                                                                                                                                                                                                                                                                                                                                                                                                                                                                                                                                              |
| <b>Corresponding Author:</b>                                                                                                                                                                                                                                                                                      | Jonathan Izudi, MPH, Ph.D.<br>Mbarara University of Science and Technology<br>Mbarara, UGANDA                                                                                                                                                                                                                                                                                                                                                                                                                                                                                                                                                                                                                                                                                                                                                                                                                                                                                                                                                                                                                                                                                                                                                                                                                                                                                                                                                                                                                                                                                                                                                                                                                                                                                                                                                                                                                             |
| <b>Keywords:</b>                                                                                                                                                                                                                                                                                                  | Antenatal care, Care bundle, Maternal health, MomCare, Postnatal care, Skilled birth attendance                                                                                                                                                                                                                                                                                                                                                                                                                                                                                                                                                                                                                                                                                                                                                                                                                                                                                                                                                                                                                                                                                                                                                                                                                                                                                                                                                                                                                                                                                                                                                                                                                                                                                                                                                                                                                           |
| <b>Abstract:</b>                                                                                                                                                                                                                                                                                                  | <p>Between 2019 and 2022, the digital dividend project (DDP), a technology-based intervention that combined a care bundle (MomCare) and a quality improvement bundle (SafeCare) to empower mothers to access care during pregnancy, labor and delivery, and postnatally, was implemented in Kenya and Tanzania. The ultimate goal is improved maternal and newborn health outcomes. We describe the experiences of mothers in accessing and using health services under MomCare, and the experiences of the health workers in providing the services. We conducted a qualitative evaluation across health facilities in Kenya and Tanzania enrolled in MomCare. We held Interviews with mothers and health workers at the antenatal care (ANC), skilled birth attendance (SBA), and postnatal care (PNC) service delivery points. We performed content analysis and reported our findings using themes along with quotes from the participants. We studied 127 mothers (76 in Kenya, 51 in Tanzania) and 119 health workers. Our findings revealed that mothers had easy access to health services, had early and full ANC attendance, respectful care, had no financial constraints, received good quality care and all needed medications, and sufficient health education. Health worker experiences included a new opportunity to provide quality maternal and newborn care, adherence to the standard of care, and positive and fulfilling practice. On the health systems front, improvements were reported regarding emergency response and continual care, infrastructure including medical supplies and logistics, staffing, and increased documentation. Overall, MomCare strengthened the healthcare system to deliver quality maternal and child health services. We recommend the replication of MomCare in settings with similar maternal and child health challenges in sub-Saharan Africa and beyond.</p> |
| <b>Order of Authors:</b>                                                                                                                                                                                                                                                                                          | Jonathan Izudi, MPH, Ph.D.<br>Henry Odero Owoko, MA<br>Moussa Bagayoko, MPH, Ph.D.<br>Damazo Kadengye                                                                                                                                                                                                                                                                                                                                                                                                                                                                                                                                                                                                                                                                                                                                                                                                                                                                                                                                                                                                                                                                                                                                                                                                                                                                                                                                                                                                                                                                                                                                                                                                                                                                                                                                                                                                                     |
| <b>Additional Information:</b>                                                                                                                                                                                                                                                                                    |                                                                                                                                                                                                                                                                                                                                                                                                                                                                                                                                                                                                                                                                                                                                                                                                                                                                                                                                                                                                                                                                                                                                                                                                                                                                                                                                                                                                                                                                                                                                                                                                                                                                                                                                                                                                                                                                                                                           |
| <b>Question</b>                                                                                                                                                                                                                                                                                                   | <b>Response</b>                                                                                                                                                                                                                                                                                                                                                                                                                                                                                                                                                                                                                                                                                                                                                                                                                                                                                                                                                                                                                                                                                                                                                                                                                                                                                                                                                                                                                                                                                                                                                                                                                                                                                                                                                                                                                                                                                                           |
| <b>Financial Disclosure</b><br><br>Enter a financial disclosure statement that describes the sources of funding for the work included in this submission. Review the <a href="#">submission guidelines</a> for detailed requirements. View published research articles from <a href="#">PLOS ONE</a> for specific | The evaluation was supported by Children's Investment Fund (CIFF), Kenya. The funder had no role in study design, data collection and analysis, decision to publish, or preparation of the manuscript.                                                                                                                                                                                                                                                                                                                                                                                                                                                                                                                                                                                                                                                                                                                                                                                                                                                                                                                                                                                                                                                                                                                                                                                                                                                                                                                                                                                                                                                                                                                                                                                                                                                                                                                    |

examples.

This statement is required for submission and **will appear in the published article** if the submission is accepted. Please make sure it is accurate.

**Unfunded studies**

Enter: *The author(s) received no specific funding for this work.*

**Funded studies**

Enter a statement with the following details:

- Initials of the authors who received each award
- Grant numbers awarded to each author
- The full name of each funder
- URL of each funder website
- Did the sponsors or funders play any role in the study design, data collection and analysis, decision to publish, or preparation of the manuscript?
- **NO** - Include this sentence at the end of your statement: *The funders had no role in study design, data collection and analysis, decision to publish, or preparation of the manuscript.*
- **YES** - Specify the role(s) played.

\* typeset

**Competing Interests**

Use the instructions below to enter a competing interest statement for this submission. On behalf of all authors, disclose any [competing interests](#) that could be perceived to bias this work—acknowledging all financial support and any other relevant financial or non-financial competing interests.

This statement is **required** for submission and **will appear in the published article** if the submission is accepted. Please make sure it is accurate and that any funding sources listed in your Funding Information later in the submission form are also declared in your Financial Disclosure statement.

The authors have declared that no competing interests exist.

View published research articles from [PLOS ONE](#) for specific examples.

#### NO authors have competing interests

Enter: *The authors have declared that no competing interests exist.*

#### Authors with competing interests

Enter competing interest details beginning with this statement:

*I have read the journal's policy and the authors of this manuscript have the following competing interests: [insert competing interests here]*

\* typeset

#### Ethics Statement

Enter an ethics statement for this submission. This statement is required if the study involved:

- Human participants
- Human specimens or tissue
- Vertebrate animals or cephalopods
- Vertebrate embryos or tissues
- Field research

Write "N/A" if the submission does not require an ethics statement.

General guidance is provided below. Consult the [submission guidelines](#) for detailed instructions. **Make sure that all information entered here is included in the Methods section of the manuscript.**

We received ethical review and approval from the African Population and Health Research Center (APHRC) Internal Ethics Committee. The African Medical Research Foundation Ethical and Scientific Review Committee or AMREF-ESRC provided external review and ethical approval in Kenya (reference number: P911-2020). In Tanzania, the National Institute for Medical Research or NIMR (reference number: NIMR/HQ/R.8a/Vol.IX/3689) provided ethical clearance. All ethical approvals preceded the evaluation and all participants provided written informed consent.

**Format for specific study types**

**Human Subject Research (involving human participants and/or tissue)**

- Give the name of the institutional review board or ethics committee that approved the study
- Include the approval number and/or a statement indicating approval of this research
- Indicate the form of consent obtained (written/oral) or the reason that consent was not obtained (e.g. the data were analyzed anonymously)

**Animal Research (involving vertebrate animals, embryos or tissues)**

- Provide the name of the Institutional Animal Care and Use Committee (IACUC) or other relevant ethics board that reviewed the study protocol, and indicate whether they approved this research or granted a formal waiver of ethical approval
- Include an approval number if one was obtained
- If the study involved *non-human primates*, add *additional details* about animal welfare and steps taken to ameliorate suffering
- If anesthesia, euthanasia, or any kind of animal sacrifice is part of the study, include briefly which substances and/or methods were applied

**Field Research**

Include the following details if this study involves the collection of plant, animal, or other materials from a natural setting:

- Field permit number
- Name of the institution or relevant body that granted permission

**Data Availability**

Authors are required to make all data underlying the findings described fully available, without restriction, and from the time of publication. PLOS allows rare exceptions to address legal and ethical concerns. See the [PLOS Data Policy](#) and [FAQ](#) for detailed information.

Yes - all data are fully available without restriction

A Data Availability Statement describing where the data can be found is required at submission. Your answers to this question constitute the Data Availability Statement and **will be published in the article**, if accepted.

**Important:** Stating 'data available on request from the author' is not sufficient. If your data are only available upon request, select 'No' for the first question and explain your exceptional situation in the text box.

Do the authors confirm that all data underlying the findings described in their manuscript are fully available without restriction?

**Describe where the data may be found in full sentences. If you are copying our sample text, replace any instances of XXX with the appropriate details.**

- If the data are **held or will be held in a public repository**, include URLs, accession numbers or DOIs. If this information will only be available after acceptance, indicate this by ticking the box below. For example: *All XXX files are available from the XXX database (accession number(s) XXX, XXX).*
- If the data are all contained **within the manuscript and/or Supporting Information files**, enter the following: *All relevant data are within the manuscript and its Supporting Information files.*
- If neither of these applies but you are able to provide **details of access elsewhere**, with or without limitations, please do so. For example:

*Data cannot be shared publicly because of [XXX]. Data are available from the XXX Institutional Data Access / Ethics Committee (contact via XXX) for researchers who meet the criteria for access to confidential data.*

*The data underlying the results presented in the study are available from (include the name of the third party*

All relevant data are within the manuscript and its Supporting Information files.

*and contact information or URL).*

- This text is appropriate if the data are owned by a third party and authors do not have permission to share the data.

\* typeset

Additional data availability information:

1  
2  
3  
4  
5  
6  
7  
8  
9  
10  
11  
12  
13  
14  
15  
16  
17  
18  
19  
20  
21  
22  
23  
24  
25  
26  
27  
28  
29

## Full title

Experiences of mothers and health workers with a Care Bundle in Kenya and Tanzania: a qualitative evaluation

## Short title

Experiences with Care bundle in Kenya and Tanzania: a qualitative evaluation

## Authors

<sup>1</sup>\*Jonathan Izudi, <sup>1</sup>Henry Odero Owoko, <sup>1</sup>Moussa Bagayoko, <sup>1</sup>Damazo Kadengye

## Author affiliations

1. African Population and Health Research Center (APHRC), Nairobi, Kenya.

\*Corresponding author

Email: [jonahzd@gmail.com](mailto:jonahzd@gmail.com) (JI)

Email: [jizudi@aphrc.org](mailto:jizudi@aphrc.org) (JI)

30 **Abstract**

31 Between 2019 and 2022, the digital dividend project (DDP), a technology-based intervention that  
32 combined a care bundle (MomCare) and a quality improvement bundle (SafeCare) to empower  
33 mothers to access care during pregnancy, labor and delivery, and postnatally, was implemented  
34 in Kenya and Tanzania. The ultimate goal is improved maternal and newborn health outcomes.  
35 We describe the experiences of mothers in accessing and using health services under MomCare,  
36 and the experiences of the health workers in providing the services. We conducted a qualitative  
37 evaluation across health facilities in Kenya and Tanzania enrolled in MomCare. We held  
38 Interviews with mothers and health workers at the antenatal care (ANC), skilled birth attendance  
39 (SBA), and postnatal care (PNC) service delivery points. We performed content analysis and  
40 reported our findings using themes along with quotes from the participants. We studied 127  
41 mothers (76 in Kenya, 51 in Tanzania) and 119 health workers. Our findings revealed that mothers  
42 had easy access to health services, had early and full ANC attendance, respectful care, had no  
43 financial constraints, received good quality care and all needed medications, and sufficient health  
44 education. Health worker experiences included a new opportunity to provide quality maternal and  
45 newborn care, adherence to the standard of care, and positive and fulfilling practice. On the health  
46 systems front, improvements were reported regarding emergency response and continual care,  
47 infrastructure including medical supplies and logistics, staffing, and increased documentation.  
48 Overall, MomCare strengthened the healthcare system to deliver quality maternal and child health  
49 services. We recommend the replication of MomCare in settings with similar maternal and child  
50 health challenges in sub-Saharan Africa and beyond.

51

52

53

54

55

56

57



## 58 Introduction

59 Limited access to and non-use of maternal and child health services contribute to significant  
60 maternal and newborn morbidity and mortality. Globally, an estimated 810 women die daily from  
61 preventable causes related to pregnancy and childbirth, with 99% of the deaths being in sub-  
62 Saharan Africa (SSA) where access to quality maternal and child health services are limited[1].  
63 The direct causes of maternal mortality, namely excessive blood loss, infection, high blood  
64 pressure, unsafe abortion, and obstructed labor [1], and the indirect causes like anemia, malaria,  
65 tuberculosis, human immunodeficiency virus (HIV), and heart diseases among others[2] are all  
66 preventable and treatable if access to quality antenatal care (ANC), skilled birth attendance  
67 (SBA), and postnatal care (PNC) are guaranteed. The risk of under-five mortality in SSA is 15  
68 times higher than in developed regions despite a declining global trend[3], with the leading causes  
69 as preterm delivery, pneumonia, birth asphyxia, diarrhea and malaria, and malnutrition among  
70 others. These causes are equally preventable and treatable with access to quality child health  
71 services.

72

73 Both Kenya and Tanzania have poor maternal and newborn outcomes. The 2022 Demographic  
74 and Health Survey data placed the maternal mortality ratio (MMR) in Kenya at 342 deaths per  
75 100,000 live births, and in Tanzania at 524 deaths per 100,00 live births. To achieve the  
76 Sustainable Development Goal or SDG target of reducing MMR to less than 70 deaths per  
77 100,000 live births and neonatal mortality to below 12 deaths per 1,000 live births, context-specific  
78 interventions are urgently needed. One such intervention is to use digital technologies in health.  
79 For example, mobile phone technologies (sometimes called telehealth, telemedicine, e-health,  
80 or mhealth) have emerged as promising tools to improve access and use of maternal and child  
81 health services, with the ultimate goal of improving maternal and child health outcomes[4] Digital  
82 technologies remove barriers to accessing maternal health services by ensuring economic and  
83 geographic convenience[5]. Digital technologies promote health in general but also health  
84 education, health management, and health research. Digital technologies improve access to  
85 health care[6], with the added benefits of increased knowledge due to the availability of  
86 information about pregnancy and newborn health[7]. Digital technologies have been reported to  
87 increase ANC visits and improve the timing and quality of ANC services[8-10]. Telemedicine and  
88 phone-based referral networks have been recommended as solutions to address declines in the  
89 availability and use of PNC services during and after the recent COVID-19 lockdown[11].

90 By supplementing in-person visits with mobile applications, mental health outcomes during  
91 pregnancy became comparable or even better, and the replacement of in-person visits with  
92 reduced prenatal care visits using telehealth for low-risk pregnancies led to similar clinical  
93 outcomes and high patient satisfaction with care[12]. Recent systematic review and meta-analysis  
94 showed that remote breastfeeding support using digital technologies significantly reduces the risk  
95 of exclusive breastfeeding cessation at 3 months by 25%[13].

96

97 In 2019, the MMR in Kenya was 362 deaths per 100,000 live births[14], and that in Tanzania was  
98 578 deaths per 100,000 live births[15]. The 5-year neonatal mortality rate (NNMR) was 22 per  
99 1,000 live births and the infant mortality rate (IMR) was 39 per 1,000 live births[16]. In Tanzania,  
100 the NNMR was 25 deaths per 1,000 births and the IMR was 43 deaths per 1,000 births at the  
101 time[17]. These rates are among the highest in SSA. A digital dividend project, a technology-  
102 based intervention that combined a care bundle (MomCare) and quality improvement bundle  
103 (SafeCare), was therefore started in Kenya and Tanzania to improve access to quality maternal  
104 health services during pregnancy, labor and delivery, and postnatal periods, with the overall goal  
105 of improving maternal and newborn health outcomes. The project intended to achieve the  
106 outcomes through 1) contracting health workers to provide quality care for women; 2) assessing  
107 and improving the quality of care provided through SafeCare standards and tools; 3) monitoring  
108 health facilities for quality of care to ensure optimal pregnancy journey at the best cost; 4)  
109 providing women with the means to save or access subsidies including insurance and top-ups to  
110 pay for health services (the health wallet), and 5) rewarding health workers with bonuses in  
111 recognition for quality services that meet all pre-agreed criteria for healthcare delivery. To date,  
112 little is known about the experiences of mothers and health workers with MomCare. Here, we  
113 described the experiences of mothers in accessing and utilizing MomCare during antenatal care,  
114 labor and delivery, and postnatal care. We also described the experiences of health workers in  
115 providing health services to mothers, both in Kenya and Tanzania between 2019 and 2021.

116

117

118

119

## 120 **Methods and materials**

### 121 **Description of MomCare**

122 Between 2019 and September 2022, a three-year digital dividend project was implemented in  
123 Tanzania and Kenya by PharmAccess Foundation International, with funding from the Children's  
124 Investment Fund Foundation (CIFF). The project combined a care bundle (MomCare) and a  
125 quality improvement bundle (SafeCare) to empower women to access the care they trust  
126 throughout their pregnancy journey and the postnatal period. Women were enrolled in a  
127 subsidized health insurance program and check-in and all the clinic costs were paid using a  
128 mobile platform. The service included "nudges" to remind women regarding check-ups and  
129 rewards to improve commitment. At the end of the care journey, health workers are compensated  
130 financially for providing high-quality care. Also, health workers were financially rewarded for  
131 positive health outcomes at the end of the care journey thus directly incentivizing quality and  
132 ensuring patient-centered care. The care journey for a mother begins at no more than 26 weeks  
133 of gestation except for teenagers and women living with human immunodeficiency virus (HIV),  
134 who could be enrolled at any point during the journey. The enrolment ended at 20 weeks post-  
135 delivery, marking the 60<sup>th</sup> week of the care journey. Each step of the care journey was digitally  
136 tracked, and data were collected and analyzed to track and improve healthcare delivery. SafeCare  
137 package is an internationally recognized standard-based quality improvement and recognition  
138 approach that has been operational since 2010[18]. To improve the efficiency and cost-  
139 effectiveness of the SafeCare process, a digital assessment tool was developed. With this tool,  
140 SafeCare provides each health facility with a SafeCare quality score on a scale of 1-5 whenever  
141 a mother uses a service followed by a discussion of an automated quality improvement plan on  
142 the same day. In addition, the tool has automatic cross-checks allowing a reduced need and time  
143 for manual assessment and reviews by supervisors.

144

### 145 **Study design and setting**

146 This qualitative evaluation was conducted in the two East African countries of Kenya and  
147 Tanzania between November and December 2022. In Kenya, 16 health facilities in Kisumu and  
148 Kakamega counties were included and in Tanzania, there were 51 health facilities from the  
149 Manyara and Kilimanjaro regions. In both countries, the regions selected had high maternal and  
150 neonatal morbidity and mortality based on the respective Demographic and Health Survey (DHS)  
151 data.

152 Besides, the regions had suboptimal use of ANC, SBA, and PNC services. For example, in  
153 Tanzania, the nomadic nature of the communities limited the use of existing services due to  
154 financial and physical constraints. In Kenya, the regions had the worst maternal and child health  
155 indicators, with MMR at 495 deaths per 100,000 live births and IMR at 40 deaths per 1000 live  
156 births in Kakamega and 50 deaths per 1000 live births in Kisumu. In both settings, data were  
157 collected among participants at the ANC, SBA, and PNC service delivery points.

158

## 159 **Study population**

160 We studied women aged 19-49 years who had benefited from MomCare and health workers who  
161 provided MomCare at the respective health facilities in Kenya and Tanzania. The women were  
162 purposively sampled based on the maximum variance sampling method, an approach that  
163 allowed equal representation of all women based on residence (rural versus urban), parity,  
164 insurance status, receipt of incentives, and level of education. The same sampling approach was  
165 applied to health workers (physicians, nurses, and midwives), health facility level, and years of  
166 experience (<5 versus ≥5 years). At the managerial and leadership levels, we interviewed the  
167 health facility In-Charges, and for each of the categories of health workers, a minimum of five  
168 were included.

169

## 170 **Data collection**

171 Data were collected through in-depth interviews (IDI) with mothers and health workers, and a  
172 focused group discussion (FGD) with mothers. Interviews were conducted in a noiseless place  
173 within the health facility premise, Monday to Friday, 9.00 am to 5.00 pm. The data collection  
174 focused on the experiences of mothers as beneficiaries of MomCare and the health workers'  
175 experiences in providing maternal and child health services under MomCare. IDIs were conducted  
176 in the local language “*Kiswahili*” with the women and in the English language with health workers.  
177 FGDs were conducted by two people, a moderator, and a note taker, and each group comprised  
178 8-12 women with comparable age and parity.

179

## 180 **Quality control measures**

181 Research assistants had ≥3 years of qualitative research experience and were drawn from the  
182 study area to ensure a better understanding of the local context and to ease the data collection.

183 All research assistants are trained in the health sciences discipline, namely nursing, clinical  
184 medicine, community health, and health nutrition. They received a 5-day training on the evaluation  
185 design, data collection process, and responsible conduct of research. Research assistants were  
186 organized into teams, each comprised of five people with one as the Team Leader. The Team  
187 Leader tracked the progress of the teams daily and provided technical assistance to the teams  
188 but with the support of the evaluation team. All data collection tools were pre-tested at a distant  
189 health facility not included in the evaluation. The feedback from pre-testing the tools was used to  
190 improve the implementation of the evaluation.

191

## 192 **Statistical issues**

### 193 **Sample size estimation**

194 No sample size was calculated but the number of people interviewed depended on a priori sample  
195 size deemed sufficient to achieve saturation, a point at which no new information emerges despite  
196 additional data collection. Our a priori sample size was 210 mothers (105 Kenya, 105 Tanzania)  
197 and approximately 150 health workers (75 Kenya, 75 Tanzania). We achieved saturation with 127  
198 mothers (76 in Kenya, 51 in Tanzania) and 119 health workers.

199

### 200 **Data analysis**

201 Data were collected through voice recordings and thereafter transcribed verbatim. The transcripts  
202 were verified by replaying the voice recordings. Any disparities between the transcript and the  
203 voice recordings were corrected. Field notes were scrutinized and compared with the audio  
204 recordings and the transcripts were cross-referenced with the field notes. Areas of departure were  
205 highlighted and discussed between the analysts. Transcriptions were done by 10 research  
206 assistants with experience in qualitative research. Dedoose software version 9.0.54 was used for  
207 the data analysis. The analysis was conducted by two independent female analysts to prevent  
208 subjective bias, and each analyst had  $\geq 10$  years of experience in qualitative research. The  
209 analysts coded the transcripts independently and developed the initial codes that were later  
210 harmonized through discussions and consensus to form the final codebook. The initial codes were  
211 then applied to the rest of the transcripts. The analysis adopted a thematic content approach and  
212 followed three steps, namely data immersion, coding, and coding sort. In data immersion, the two  
213 analysts (SJ and MN) familiarized themselves with the transcripts by reading and re-reading the  
214 transcripts several times to identify common and important texts and patterns. They allowed  
215 impressions to shape the data interpretations in different and unpredictable directions.

216 SJ and MN then flagged the relevant parts of the transcripts with suitable words or codes and in  
217 the final stages, both analysts categorized the codes into themes and sub-themes in the agreed  
218 codebook. Three senior reviewers (MB, DK, and JI), with experience in qualitative and mixed-  
219 methods research, verified all emergent codes, themes, and sub-themes including the final  
220 codebook to minimize subject bias. The main themes and sub-themes were presented along with  
221 the participant's quotes.

222

## 223 **Ethical consideration**

224 We received ethical review and approval from the African Population and Health Research Center  
225 (APHRC) Internal Ethics Committee. The African Medical Research Foundation Ethical and  
226 Scientific Review Committee or AMREF-ESRC provided external review and ethical approval in  
227 Kenya (reference number: P911-2020). In Tanzania, the National Institute for Medical Research  
228 or NIMR (reference number: NIMR/HQ/R.8a/Vol.IX/3689) provided ethical clearance. All ethical  
229 approvals preceded the evaluation and all participants provided written informed consent. Number  
230 tags and pseudo names were used during data collection. Participation in the study was entirely  
231 voluntary and withdrawal from participation was permissible at any time.

232

## 233 **Results**

### 234 **Characteristics of the participants**

235 We summarize the participant's characteristics in Table 1. Overall, 127 mothers were included in  
236 the study, mainly from Kenya (n=76) but not Tanzania (n=51). The majority of the participants  
237 were from a rural setting, with parity  $\geq 2$ , secondary or more levels of education, and at the PNC  
238 clinic. Health workers were mainly in the nursing and midwifery professions combined (n= 105).

239

240

241

242

243

244

245 **Table 1: Participant Characteristics and Distributions**

| Variables  | Levels              | Kenya (n=76) | Tanzania (n=51) | Overall (n=127) |
|---------------------------------------------------------------------------------------------|---------------------|--------------|-----------------|-----------------|
| <b>Mothers</b>                                                                              |                     |              |                 |                 |
| Residence                                                                                   | Urban               | 21           | 18              | 39              |
|                                                                                             | Rural               | 44           | 29              | 73              |
|                                                                                             | Peri-urban          | 11           | 4               | 15              |
| Parity                                                                                      | 1                   | 26           | 10              | 36              |
|                                                                                             | ≥2                  | 50           | 41              | 91              |
| Level of education                                                                          | None                | 2            | 1               | 3               |
|                                                                                             | Primary             | 23           | 35              | 58              |
|                                                                                             | Secondary and over  | 51           | 15              | 66              |
| Insurance status                                                                            | Yes                 | 50           | 15              | 65              |
|                                                                                             | No                  | 26           | 36              | 62              |
| Point of service delivery                                                                   | ANC                 | 22           | 25              | 47              |
|                                                                                             | SBA                 | 21           | 4               | 25              |
|                                                                                             | PNC                 | 33           | 22              | 55              |
| <b>Health workers</b>                                                                       |                     |              |                 |                 |
| Type of health worker (n=119)                                                               | Nurses and midwives | 62           | 43              | 105             |
|                                                                                             | Physician           | 14           | 0               | 14              |

246

## 247 **Main findings**

248 We present the findings under three main themes – experiences at maternal, health worker, and  
 249 health systems levels. Table 2 presents the emergent sub and main themes. We present the  
 250 experiences of mothers based on the services received during ANC, SBA, and PNC. Health  
 251 worker experiences have been presented under three sub-themes and experiences at the health  
 252 system level were summarized under four sub-themes.

253

254

255

256

257

258

259

260 **Table 2: Summary of main themes and sub-themes.**

| Main themes                                   | Sub-themes                                                  |
|-----------------------------------------------|-------------------------------------------------------------|
| <b>Maternal experiences</b>                   | <b>Antenatal care</b>                                       |
|                                               | 1. Easy access to maternal health services                  |
|                                               | 2. Early and full ANC visits                                |
|                                               | 3. No financial constraints during the pregnancy journey    |
|                                               | 4. Respectful care                                          |
|                                               | <b>Skilled birth attendance (SBA) or labor and delivery</b> |
|                                               | 1. Improved laboratory testing                              |
|                                               | 2. Good quality care during childbirth                      |
|                                               | <b>Postnatal care</b>                                       |
|                                               | 1. Sufficient health education and good care                |
| 2. Dispensing of all prescribed medications   |                                                             |
| <b>Health worker experiences</b>              | 1. New opportunity to provide quality care                  |
|                                               | 2. Adherence to the standard of care                        |
|                                               | 3. Positive and fulfilling practice                         |
| <b>Experiences at the health system level</b> | 1. Emergency and continual care                             |
|                                               | 2. Improved infrastructure, medical supplies, and logistics |
|                                               | 3. Improved staffing                                        |
|                                               | 4. Increased documentation                                  |

261

262 **Maternal experiences during antenatal care (ANC)**

263 **Easy access to maternal health services**

264 Participants reported MomCare led to improved access to ANC services. Many of the participants  
 265 described the ANC service as of good quality. The participants were happy with the care bundle  
 266 because it has led successful pregnancy journey. Success was mentioned as the absence of  
 267 complications during pregnancy.

268 *‘What I can say about MomCare is that it is a nice program. It helps women who cannot*  
 269 *even afford ANC, SBA, and PNC to have free services. There are some services*  
 270 *MomCare also assists women with, sometimes they assist the women who require to*  
 271 *undergo cesarean section (IDI, Kenya, Mother).*



272 'MomCare is a good thing because there was a time I came when sick and got admitted  
273 like today and discharge the following day and I used it. Unlike others (insurance), you will  
274 be told that if you use it once, then you cannot use the card again for the second time that  
275 is why I like MomCare(IDI, Kenya, Mother).

276 'Upon reaching the 4th month, I used to come every week because the baby was not in a  
277 good position (IDI, Tanzania, Mother)

278

### 279 **Early and full ANC visits**

280 The participants reported having received their first ANC visit between the first and the fifth month  
281 of pregnancy, with the majority indicating to have started their first ANC visits in the fourth and  
282 third months of pregnancy. A few participants reported a late first ANC visit, which was either in  
283 the sixth or seventh month of pregnancy.

284 'I came when my pregnancy was four months. I came because I was suspecting that I am  
285 pregnant. I was sick, and I was vomiting a lot. I could not eat anything or even take water  
286 I was just vomiting, and the vomit resembled that of malaria. That is why I went to the  
287 hospital then I was told that I did not have malaria, I was pregnant. I was then told to start  
288 attending the clinic and I didn't waste time, the following week I started the clinic (IDI,  
289 Kenya, Mother).

290 Participants indicated attending all scheduled ANC visits, with many reporting four to five ANC  
291 visits and a few reporting two to three ANC visits due to late first ANC attendance. Participants  
292 with high-risk pregnancies attended as many as 7-9 ANC as they needed close monitoring.

293 'It (ANC visits) used to be every month depending on the date that you were scheduled.  
294 Let's say today is the 30th, you might be scheduled to come back next month on the 23rd.  
295 It depends. Every month you go (ANC visit) depending on the return date that you have  
296 been given (IDI, Kenya, Mother).

297 'I came for the test, and they told me I am pregnant, then I went back and waited for four  
298 months before I started going to the clinic (meaning ANC clinic) many times, I think 5 to 6  
299 times, yes. (IDI, Tanzania, Mother).

300 **No financial constraints during the pregnancy journey**

301 Participants mentioned that MomCare eased access to ANC, SBA, and PNC as the services  
302 became free insurance due to schemes like the Linda Mama and the National Health Insurance  
303 Fund. In addition, they reported that the insurance scheme provided comprehensive cover for  
304 their pregnancy journey like more than one free ultrasound scan and several laboratory tests and  
305 other procedures.

306 *'I did not make any payments in the hospital. You know a hospital like Port Florence is*  
307 *private. When you go there, you will pay a lot of money but, when you have that card or*  
308 *NHIF (National Health Insurance Fund) you do not pay for anything (IDI, Kenya, Mother).*

309 *'Free treatment. You would come to antenatal care for free, delivery was free and also*  
310 *after delivery, they were giving us small gifts for free (IDI, Kenya, Mother).*

311 *"We used to pay for an ultrasound even if you go to a bigger hospital but now if you*  
312 *wanted an ultrasound you go to the clinic unit, they sign for you and get checked for free*  
313 *so we benefited in many things so I would like to request they should improve for us even*  
314 *more" (FGD, Tanzania, Mother).*

315

316 **Respectful care**

317 It emerged that the health workers treated the mothers with respect and dignity during ANC visits,  
318 a factor that motivated them to even continue with all planned ANC schedules. The health workers  
319 also had a positive attitude towards pregnant women during their ANC visits.

320 *'Me, what motivates me is the way I am being treated when I come for services. If you ask*  
321 *people about their experiences some will tell you they gave birth in a certain hospital, they*  
322 *were abused by nurses or if they are late, they were quarreled at so I also came with that*  
323 *fear of being quarreled at when I am late because I come from far.*

324 *Sometimes, I fail to come. But, here, they are very gentle to us, and also, they have good*  
325 *services (FGD, Kenya, Mother).*

326 *'What has motivated me in this facility is that they are just perfect. I have not been to a*  
327 *hospital like this, the place is clean, good services. They just serve you well, with respect.*  
328 *(IDI, Tanzania, Mother).*

329 **Maternal experiences during SBA or labor and delivery**

330 **Improved laboratory testing**

331 Participants said the health workers performed several tests on them to check if they were at risk  
332 for complications during their pregnancy or delivery. Notable tests performed included those for  
333 HIV, COVID-19, syphilis, hepatitis, and high blood sugar level, among others.

334 *'Before going to the maternity ward, you have to get tested for COVID-19, HIV and... I*  
335 *was offered many tests and from there, they checked the position of the baby first because*  
336 *mine was done through elective CS (cesarean section) then, I was taken for surgery (FGD,*  
337 *Kenya, Mother).*

338 *'MomCare brought all the tests now we can test mothers with all the required tests such*  
339 *as the HB (hemoglobin), blood level, syphilis, HIV, urinalysis, and blood group. When the*  
340 *mother comes for the first time, she has to get tested until when she is in labor. You monitor*  
341 *her during the clinic visits until she delivers. So, we have to do the tests that I told you*  
342 *earlier like HB (hemoglobin), urinalysis, VDRL (Venereal Disease Research Laboratory*  
343 *testing for syphilis), blood group, and ultrasound, although ultrasound is the last test.'* (IDI,  
344 *Tanzania, Health worker).*

345 **Good quality care during childbirth**

346 It was stated that the quality of health services at the Momcare health facilities was good so many  
347 of the participants chose to receive both ANC and SBA services at the same health facility.  
348 MomCare health facilities were recommended to other participants because of good quality care  
349 and friendly health workers during SBA, and easy access and affordable health services.

350 *'I started here at Mukumu because I delivered all my children here. I have been coming*  
351 *to clinics here and also, even though I come from far, I prefer here because it has these*  
352 *services such as constant checking of the babies breathing, heart beating, the mother's*  
353 *condition, and even CS (cesarean section) if needed (IDI, Kenya, Mother).*

354 *'When I arrived, the doctor put on gloves, he told me to lie on the bed, he examined my*  
355 *belly, after that, he was able to check if the cervix had dilated that is when he told me I*  
356 *must wait a bit, I had to do some exercise here. Together with one nurse we went around*  
357 *and came back. During the day she ensured I ate well, that night we slept here (at the*  
358 *facility) with the nurses, the second day they woke me up at five o'clock we went for some*  
359 *exercise, and at six o'clock they examined me, they told me that my cervix had dilated,*

360 *they encouraged me to take some tea and on that morning at six o'clock I delivered (IDI,*  
361 *Tanzania, Mother).*

## 362 **Maternal experiences during PNC**

### 363 **Sufficient health education and good care**

364 Complications during the PNC period are unpredictable both for the mother and the newborn so  
365 information on when to seek help is important. The participants indicated that the health workers  
366 provided them with sufficient health information during PNC visits to ensure their safety and that  
367 of the newborns.

368 *'After delivery, they continue to educate you on how to bathe the baby, then tell you to*  
369 *breastfeed the baby for six months (FGD, Kenya).*

370 *'Immediately after delivery, they clean you and then they give you an injection to stop the*  
371 *bleeding and then you dress up and go to the resting bed. They observe you and if your*  
372 *status is okay, you are discharged the next day. You are told to go home. They give you*  
373 *a date to come for clinic and if the baby did not get the BCG vaccine and then there is the*  
374 *child's medical card. You follow up on that.'* (IDI, Tanzania, Mother)

### 375 **Dispensing of all prescribed medications**

376 A sufficient supply of medications or drugs is an important component of a strong health system.  
377 Through MomCare, all required medications during PNC became available. Participants indicated  
378 they received all the required medications during PNC visits.

379 *"All medications will be given to this mother as also immunization services we offer. In*  
380 *case the child is aged between 0-14 weeks we treat this child and also process referrals*  
381 *if we have an emergency to refer the mother for further management, we just refer using*  
382 *our ambulance because it also helps the mother, it (MomCare) covers ambulance services*  
383 *(IDI, Kenya, Mother).*

384 *"The services we accessed during MomCare were much improved because we were well-*  
385 *considered in that, whenever the facility ran out of drugs, they were replenished on time.*  
386 *When I was not on the program (MomCare), I had to wait for the drugs to come from home*  
387 *by which time, I would have suffered because that took the time (FGD, Tanzania).*

## 388 **Healthcare provider experiences**

### 389 **New opportunity to provide quality care**

390 Health workers indicated that MomCare presented them with a new opportunity to provide quality  
391 health services to mothers and their newborns. They felt motivated to provide all needed services  
392 as the care bundle had incentives like training, regular support supervision, and follow-up by the  
393 implementing partners.

394 *'Basically, it (MomCare) has allowed us, the health workers, to provide quality health*  
395 *services to these women and babies through lab tests, ultrasound, and also medication*  
396 *like we have to give some medication in the process of labor and when they go home (*  
397 *IDI, Kenya, Health worker)*

398 *'It (meaning allowances) encourages a worker (meaning a health worker) who can do*  
399 *extra work, or extra hours to work. We have a few staff. So MomCare has truly helped to*  
400 *enlighten us.'* (IDI, Tanzania, Health worker).

### 401 **Adherence to the standard of care**

402 Health workers indicated that MomCare was less restrictive, allowing them to adhere to the  
403 standards of care at all times. For instance, they indicated that the program permitted additional  
404 laboratory tests like urinalysis, Rhesus factor, and examinations like ultrasound scanning to be  
405 performed whenever needed.

406 *'I will manage the post-delivery process in case of a complication. I'm sure MomCare will*  
407 *take care of that. Then also the clients are free; the one that uses MomCare just comes in*  
408 *free. Even if she's sick, just comes in compared with the others (IDI, Kenya, Health*  
409 *Worker).*

410 *'Because of Momcare, after a mother has delivered, she is now in PNC. We shall give her*  
411 *folate and vitamin K. You will also give her some eye ointment for the baby to prevent eye*  
412 *infections. You will observe her for 24 hours to see if there is going to be any challenge or*  
413 *not.*

414 *After you confirm that the mother is in good health, you can release her to go home. You*  
415 *will give her appointments to come after 7 days and 21 days.'* (IDI, Tanzania, Mother).

416 **Positive and fulfilling practice**

417 MomCare was regarded as a blessing to health facilities and mothers. Health workers stated the  
418 program served women from all walks of life regardless of their socioeconomic status, residence,  
419 age, and HIV status. In addition, they mentioned that by providing high-quality care to the mothers,  
420 they experienced a positive and fulfilling practice since all the mothers had positive outcomes at  
421 the end of their pregnancy journey.

422 *‘That mother had four pregnancies and all of them were dying before delivery. The one*  
423 *we delivered now is the fourth. She had pressure, she had fibroids, and so on. So, the*  
424 *staff here began moving with her from day one of conception. So, when she reached six*  
425 *months, she was more in danger because children used to die between five, six, and*  
426 *seven months. So, the doctors decided to operate. They delivered the baby at six months.*  
427 *We put it in our New Born Unit. Both survived and we are happy we helped. (IDI, Kenya,*  
428 *Health worker).*

429 **Experiences at the health system level**

430 **Emergency and continual care**

431 MomCare was considered an inclusive health service delivery by health workers. Health workers  
432 mentioned that MomCare led to a fast response to emergencies whenever needed thus reducing  
433 the risk of maternal deaths.

434 *‘..... they (mothers) do benefit in terms of emergencies. If you have a mother who is*  
435 *under MomCare and maybe she is in the village and goes into labor, and then she calls,*  
436 *we usually provide an ambulance. Do you see that as an advantage that others (mothers*  
437 *not covered by MomCare) would not get? (IDI, Kenya, Health Worker).*

438 *‘There are big changes. MomCare has helped to reduce maternal deaths since it has*  
439 *supported those with low income, who could not afford some of the costs related to child*  
440 *delivery. Women come here without any cash, but the MomCare package caters to their*  
441 *needs. If there is any minor need for further medication, the facility usually top-ups. The*  
442 *same is done even in the case of surgery.’ (IDI, Tanzania, Health worker).*

443

444

445

446 *'When it comes to delivery, even at one time, it came a time when the program realized*  
447 *that there are women that time there was during COVID time (COVID-19), movements*  
448 *were restricted they provided ambulance services and women were ferried as long as they*  
449 *would call, the hospital would provide an ambulance and as long as is it is confirmed it is*  
450 *a MomCare mother they pay for it then, in maternity as they deliver, all those services and*  
451 *the expenses that she would incur the MomCare would cater for their payments (IDI,*  
452 *Kenya, Health worker).*

### 453 **Improved infrastructure, medical supplies, and logistics**

454 Health workers reported that MomCare guidelines helped to improve the health facility  
455 infrastructure as well as the availability of medical equipment and supplies. Such improvements  
456 have been reported to have not only reduced inter-health facility referrals but increased positive  
457 outcomes and created a conducive workplace.

458 *'Facility (Health facility) has signage all over that will give you directions. You will know*  
459 *this is MCH (Maternal and Child Health Clinic), that is accounts, and that is administration,*  
460 *all courtesy of MomCare. The facility walls were also painted and the iron sheets were*  
461 *painted afresh. That was in 2019 it was courtesy of MomCare. The computers, most are*  
462 *courtesy of MomCare. Sometimes staff takes tea once in a while, courtesy of MomCare.*  
463 *A lot has happened. We have a new theatre, courtesy of MomCare. It's because of the*  
464 *increase in the number of clients (women) that the new theatre had to be built (IDI, Kenya,*  
465 *Health worker).*

466 *'It (MomCare) has helped a lot by improving infrastructure that is offering delivery services,*  
467 *it has helped to build family planning facilities, and it has helped in buying maternity*  
468 *equipment and drugs. Those (health workers) who were offering services to the women*  
469 *also received allowances.'* (IDI, Tanzania, Health worker).

470 *'In the health facility, generally, our maternity has improved, and we have also improved*  
471 *our postnatal wards because these are the major areas, even the antenatal. We had to*  
472 *move from the other side and come to this side because of the number of clients and at*  
473 *least we have a space for all of them to be accommodated (IDI, Tanzania, Health Worker).*

### 474 **Improved staffing**

475 Understaffing was a common problem at health facilities before MomCare was introduced. Health  
476 workers stated that MomCare nurses and midwives were hired to keep pace with the growing  
477 number of deliveries.

478 *'So, as a facility (health facility), I think we had less personnel by then, but the ones we*  
479 *have now are helping us run because we have hired five nurses, one clinical officer, and*  
480 *then of course, a lab tech (IDI, Kenya, Health worker).*

#### 481 **Increased documentation**

482 Health workers noted that the project involved a lot of paperwork, especially during registration  
483 and since the majority of the women were illiterate, the process even became much harder.

484 *'So, for negatives, I would only say that it (MomCare) had paperwork. It (MomCare) had*  
485 *a lot of paperwork that I did not like as a person and even the women because you see*  
486 *here, many people, don't even know how to write. They don't even know how to sign. So*  
487 *immediately they're treated, or they come for the ANC, there is a sheet that they were*  
488 *signing and giving their phone numbers and other details and the women disliked that*  
489 *even though we were assisting, you cannot assist a person to put her signature (IDI,*  
490 *Kenya, Health worker).*

491

## 492 **Discussion**

493 We report maternal experiences in accessing and using antenatal, skilled birth, and postnatal  
494 care, and the experiences of health workers in providing the services during MomCare in Kenya  
495 and Tanzania. Our findings revealed positive experiences with MomCare among mothers and  
496 health workers. Maternal experiences revealed easy access to health services, early and full ANC  
497 attendance, respectful care, absence of financial constraints, good quality care, receipt of all  
498 needed medications, and sufficient health education. Findings from health workers revealed a  
499 new opportunity to provide quality maternal and newborn care, adherence to the standard of care,  
500 and positive and fulfilling practice. On the health systems front, improvements were found in  
501 emergency response and continual care, infrastructure, medical supplies and logistics, staffing,  
502 and increased documentation at all three service delivery points.

503

504 Our findings of positive experiences among mothers and health workers are not surprising as  
505 several studies report digital technologies to improve the utilization of antenatal, skilled birth, and  
506 postnatal care. Digital health technologies are increasingly being used in several sub-Saharan  
507 African countries to improve maternal and child health services. Notable health services being  
508 improved using digital health technologies include ANC, SBA, and PNC among others[19].



509 One study conducted in Southern Tanzania showed that a digital health intervention improved  
510 neonatal healthcare outcomes, namely temperature control by keeping the neonates dry and  
511 warm, cord-cutting practices among health workers, and breastfeeding practices among mothers,  
512 including better preparation for obstetric care among expectant mothers through birth  
513 preparedness and complication readiness plans[19]. Our findings are consistent with the previous  
514 studies. Our findings are also in agreement with a previous study conducted in Tanzania that  
515 showed the use of digital health solutions for high-risk pregnancies improves the identification of  
516 women at risk for obstetric complications and the subsequent referral to higher-level health  
517 facilities[20].

518

519 We found MomCare led to positive experiences among health workers regarding service  
520 provision, which is not surprising. One previous study conducted about health workers' knowledge  
521 and attitudes towards the use of digital technologies in the provision of maternal health services  
522 at Tumbi regional referral hospital in Tanzania found increased use of digital health  
523 technologies[21]. The study further showed that health workers understood the importance of  
524 digital health technologies in improving maternal health services besides reporting a positive  
525 attitude towards digital health technologies[21]. In another Tanzanian study, a mobile job aid was  
526 successfully used to support the counseling of women about contraception[22], which is  
527 consistent with our findings about the better quality of care during the postnatal care period due  
528 to MoMcare. Our findings agree with the increasing use of digital health technologies to eliminate  
529 barriers to accessing health services in sub-Saharan Africa[5].

530

531 We found a strong health system due to MomCare concerning improvements in maternal and  
532 neonatal health services delivery, increased staffing (human resources for health) for the delivery  
533 of maternal and neonatal health services, strengthening of the supply of health commodities  
534 (sufficient drugs, supplies, and equipment) combined with infrastructural development, and  
535 increased financing for maternal and neonatal health services delivery, all consistent with the  
536 World Health Organization's (WHO's) framework for health systems strengthening[23].

537

538

539

540 The WHO argues that a strong health system produces the desired quantity and quality of health  
541 services, has an adequate number of skilled health workers of an optimal mix, receives sufficient  
542 funding to support health service delivery, has a strong medical logistics and supply chain, and  
543 has a strong health management information system. With the implementation of MomCare all  
544 six WHO's health systems strengthening blocks remarkably improved.

545

## 546 **Study strengths and limitations**

547 The study strengths include a **large sample size**, data collection from all categories of participants,  
548 and all three service delivery points (ANC, SBA, and PNC). **Limitations include a lack of baseline**  
549 **qualitative data for comparison of the present findings and the use of a qualitative evaluation that**  
550 **cannot demonstrate causation.**

551

## 552 **Conclusion and recommendations**

553 The implementation MomCare strengthened the health system for maternal and child health  
554 services delivery. Maternal experiences regarding access and utilization of ANC, SBA, and PNC  
555 were largely positive. Health worker experiences revealed satisfaction with health services  
556 delivery and a positive and fulfilling practice. We recommend the replication of MomCare in  
557 settings with similar maternal and child health challenges in SSA and beyond.

558

## 559 **Acknowledgments**

560 We thank the Children Investment Fund Foundation (CIFF) and PharmAccess International for  
561 supporting this evaluation. We are overwhelmingly indebted to the study participants for their time  
562 in providing invaluable information. We are grateful to all research assistants for their support.

563

564

565

566

567

568

## 570 **References**

- 571 1. Onambele L, Ortega-Leon W, Guillen-Aguinaga S, Forjaz MJ, Yoseph A, Guillen-  
572 Aguinaga L, et al. Maternal Mortality in Africa: Regional Trends (2000-2017). *International journal*  
573 *of environmental research and public health*. 2022;19(20). Epub 2022/10/28. doi:  
574 10.3390/ijerph192013146. PubMed PMID: 36293727; PubMed Central PMCID:  
575 PMCPMC9602585.
- 576 2. Kurjak A, Stanojević M, Dudenhausen J. Why maternal mortality in the world remains  
577 tragedy in low-income countries and shame for high-income ones: will sustainable development  
578 goals (SDG) help? *Journal of perinatal medicine*. 2023;51(2):170-81. Epub 2022/06/01. doi:  
579 10.1515/jpm-2022-0061. PubMed PMID: 35636412.
- 580 3. Chamie J. *The Dying Children Divide. Population Levels, Trends, and Differentials: More*  
581 *Important Population Matters*: Springer; 2023. p. 301-4.
- 582 4. Feroz A, Perveen S, Aftab W. Role of mHealth applications for improving antenatal and  
583 postnatal care in low and middle income countries: a systematic review. *BMC health services*  
584 *research*. 2017;17(1):704. Epub 2017/11/09. doi: 10.1186/s12913-017-2664-7. PubMed PMID:  
585 29115992; PubMed Central PMCID: PMCPMC5678803.
- 586 5. Bilal W, Mohanan P, Rahmat ZS, Ahmed Gangat S, Islam Z, Essar MY, et al. Improving  
587 access to maternal care in Africa through telemedicine and digital health. *The International journal*  
588 *of health planning and management*. 2022;37(4):2494-500. Epub 2022/05/17. doi:  
589 10.1002/hpm.3498. PubMed PMID: 35570361.
- 590 6. Heřman H, Faridová A, Tefr O, Farid S, Ayayee N, Trojanová K, et al. Telemedicine in  
591 prenatal care. *Central European journal of public health*. 2022;30(2):131-5. Epub 2022/07/26. doi:  
592 10.21101/cejph.a7458. PubMed PMID: 35876602.
- 593 7. Kusyanti T, Wirakusumah FF, Rinawan FR, Muhith A, Purbasari A, Mawardi F, et al.  
594 *Technology-Based (Mhealth) and Standard/Traditional Maternal Care for Pregnant Woman: A*  
595 *Systematic Literature Review*. *Healthcare (Basel, Switzerland)*. 2022;10(7). Epub 2022/07/28.  
596 doi: 10.3390/healthcare10071287. PubMed PMID: 35885813; PubMed Central PMCID:  
597 PMCPMC9322765.
- 598 8. Jo Y, Labrique AB, Lefevre AE, Mehl G, Pfaff T, Walker N, et al. Using the lives saved tool  
599 (LiST) to model mHealth impact on neonatal survival in resource-limited settings. *PloS one*.  
600 2014;9(7):e102224. Epub 2014/07/12. doi: 10.1371/journal.pone.0102224. PubMed PMID:  
601 25014008; PubMed Central PMCID: PMCPMC4094557.

- 602 9. Lund S, Nielsen BB, Hemed M, Boas IM, Said A, Said K, et al. Mobile phones improve  
603 antenatal care attendance in Zanzibar: a cluster randomized controlled trial. *BMC pregnancy and*  
604 *childbirth*. 2014;14:29. Epub 2014/01/21. doi: 10.1186/1471-2393-14-29. PubMed PMID:  
605 24438517; PubMed Central PMCID: PMCPMC3898378.
- 606 10. Kaewkungwal J, Singhasivanon P, Khamsiriwatchara A, Sawang S, Meankaew P,  
607 Wechsart A. Application of smart phone in "Better Border Healthcare Program": a module for  
608 mother and child care. *BMC medical informatics and decision making*. 2010;10:69. Epub  
609 2010/11/05. doi: 10.1186/1472-6947-10-69. PubMed PMID: 21047412; PubMed Central PMCID:  
610 PMCPMC2989931.
- 611 11. Dzinamarira T, Moyo E, Pierre G, Mpabuka E, Kahere M, Tungwarara N, et al. Postnatal  
612 care services availability and utilization during the COVID-19 era in sub-Saharan Africa: A rapid  
613 review. *Women and birth : journal of the Australian College of Midwives*. 2022. Epub 2022/10/18.  
614 doi: 10.1016/j.wombi.2022.10.002. PubMed PMID: 36253282; PubMed Central PMCID:  
615 PMCPMC9550672.
- 616 12. Cantor AG, Jungbauer RM, Totten AM, Tilden EL, Holmes R, Ahmed A, et al. Telehealth  
617 Strategies for the Delivery of Maternal Health Care : A Rapid Review. *Annals of internal medicine*.  
618 2022;175(9):1285-97. Epub 2022/07/26. doi: 10.7326/m22-0737. PubMed PMID: 35878405.
- 619 13. Gavine A, Marshall J, Buchanan P, Cameron J, Leger A, Ross S, et al. Remote provision  
620 of breastfeeding support and education: Systematic review and meta-analysis. *Maternal & child*  
621 *nutrition*. 2022;18(2):e13296. Epub 2021/12/30. doi: 10.1111/mcn.13296. PubMed PMID:  
622 34964542; PubMed Central PMCID: PMCPMC8932718.
- 623 14. Lang'at E, Mwanri L, Temmerman M. Effects of implementing free maternity service policy  
624 in Kenya: an interrupted time series analysis. *BMC health services research*. 2019;19(1):645.  
625 Epub 2019/09/08. doi: 10.1186/s12913-019-4462-x. PubMed PMID: 31492134; PubMed Central  
626 PMCID: PMCPMC6729061.
- 627 15. Prasad N, Mwakatundu N, Dominico S, Masako P, Mongo W, Mwanshemele Y, et al.  
628 Improving Maternal and Reproductive Health in Kigoma, Tanzania: A 13-Year Initiative. *Global*  
629 *health, science and practice*. 2022;10(2). Epub 2022/04/30. doi: 10.9745/ghsp-d-21-00484.  
630 PubMed PMID: 35487559; PubMed Central PMCID: PMCPMC9053157.
- 631 16. Magati P, Drope J, Mureithi L, Lencucha R. Socio-economic and demographic  
632 determinants of tobacco use in Kenya: findings from the Kenya Demographic and Health Survey  
633 2014. *Pan Afr Med J*. 2018;30:166. Epub 2018/11/21. doi: 10.11604/pamj.2018.30.166.14771.  
634 PubMed PMID: 30455795; PubMed Central PMCID: PMCPMC6235476.

- 635 17. Woldeamanuel BT. Trends and factors associated to early initiation of breastfeeding,  
636 exclusive breastfeeding and duration of breastfeeding in Ethiopia: evidence from the Ethiopia  
637 Demographic and Health Survey 2016. *International breastfeeding journal*. 2020;15(1):3. Epub  
638 2020/01/12. doi: 10.1186/s13006-019-0248-3. PubMed PMID: 31924229; PubMed Central  
639 PMCID: PMCPMC6953467.
- 640 18. Syengo M, Suchman L. Private Providers' Experiences Implementing a Package of  
641 Interventions to Improve Quality of Care in Kenya: Findings From a Qualitative Evaluation. *Global  
642 health, science and practice*. 2020;8(3):478-87. Epub 2020/10/04. doi: 10.9745/ghsp-d-20-00034.  
643 PubMed PMID: 33008859; PubMed Central PMCID: PMCPMC7541106.
- 644 19. Sarkar ND, Grietens KP, Dillip A. Towards a digitally-enabled, community-based  
645 responsive health system in Tanzania: a formative study for the Afya-Tek digitised health initiative.  
646 *The Lancet Global Health*. 2020;8:S35.
- 647 20. Gupta A, Agrawal R, Gupt A, Guleri R, Bajpayee D, Joshi N, et al. Systems E-approach  
648 for women at risk (SEWA)-A digital health solution for detection of high-risk pregnancies. *Journal  
649 of family medicine and primary care*. 2021;10(10):3712-9. Epub 2021/12/23. doi:  
650 10.4103/jfmprc.jfmprc\_466\_21. PubMed PMID: 34934670; PubMed Central PMCID:  
651 PMCPMC8653496.
- 652 21. Thadeus WK, Mushi LD. Health care professional knowledge and attitude towards the use  
653 of digital technologies in provision of maternal health services at Tumbi regional referral hospital  
654 in Tanzania. *Journal of Medical Research Innovation*. 2021;5(1):e000233-e.
- 655 22. McCool J, Dobson R, Muinga N, Paton C, Pagliari C, Agawal S, et al. Factors influencing  
656 the sustainability of digital health interventions in low-resource settings: Lessons from five  
657 countries. *Journal of global health*. 2020;10(2):020396. Epub 2020/12/05. doi:  
658 10.7189/jogh.10.020396. PubMed PMID: 33274059; PubMed Central PMCID: PMCPMC7696238  
659 form (available upon request from the corresponding author), and declare no conflicts of interest.
- 660 23. World Health Organization. Everybody's business--strengthening health systems to  
661 improve health outcomes: WHO's framework for action. 2007.

662

## 663 **Supplementary information**

664 S1 File: Codebook.



Click here to access/download  
**Supporting Information**  
S1 File.docx



Supplement: pone.0294536.s002.pdf [file pone.0294536.s002.pdf]
